# Supplementary material for: Early Life Nutrition and the Role of Complementary Feeding on Later Adherence to the Mediterranean Diet in Children up to 3 Years of Age
Source: MDPI journal article supplement (doi:10.3390/nu14081664), 2022-04-16
Supplement: s1 [file s1]

**Supplementary Table S1.** Evolution in the intake of the major food groups along the follow-up.

|                                             | Lactation period     | Weaning period      | Transition diet      | Family diet           |                     |
|---------------------------------------------|----------------------|---------------------|----------------------|-----------------------|---------------------|
|                                             | 2-3 months<br>(n=97) | 6 months<br>(n=93)  | 12 months<br>(n=90)  | 24 months<br>(n=76)   | 36 months<br>(n=64) |
| <b>Fats<sup>a</sup></b>                     | 0                    | 0 (0-10.0)*         | 10 (10-10)*          | 10 (10-10)            | 10 (10-20)          |
| <b>Vegetables (g/day)</b>                   | 0                    | 0 (0-66.3)*         | 149.2 (96.4-205.0)*  | 85.7 (38.5-128.6)     | 72.0 (30.5-155.0)   |
| <b>Potatoes and tubers (g/day)</b>          | 0                    | 0 (0-28.1)*         | 44.6 (25.0-75.0)*    | 33.6 (20.6-50.3)      | 38.9 (21.3-53.6)    |
| <b>Cereals and cereals products (g/day)</b> | 0                    | 0                   | 30.7 (15.0-54.3)*    | 67.7 (41.0-105.4)     | 83.9 (58.9-115.7)   |
| <b>Fruits (g/day)</b>                       | 0                    | 52.8 (0-135.8)*     | 158.6 (109.9-205.6)* | 157.6 (96.4-262.6)    | 173.7 (114.9-277.0) |
| <b>Legumes (g/day)</b>                      | 0                    | 0                   | 15.0 (5.7-25.7)*     | 27.8 (18.6-41.6)      | 34.3 (19.3-52.9)    |
| <b>Meat and meat products (g/day)</b>       | 0                    | 0                   | 25.7 (17.0-37.1)*    | 39.6 (25.7-56.4)      | 43.6 (26.4-60.0)    |
| <b>Fish (g/day)</b>                         | 0                    | 0                   | 13.6 (8.6-40.7)*     | 27.1 (13.6-51.4)      | 27.1 (25.7-51.4)    |
| <b>Eggs (g/day)</b>                         | 0                    | 0                   | 9.1 (9.1-18.3)*      | 18.3 (18.3-27.4)      | 18.3 (18.3-27.4)    |
| <b>Milk and dairy products<sup>b</sup></b>  | 0                    | 0                   | 125.0 (51.3-150.0)*  | 430.36 (264.3-559.5)* | 360.7 (218.8-563.3) |
| <b>Human breast milk (ml/day)</b>           | 180 (0-780)          | 0 (0-680)           | 0*                   | 0                     | 0                   |
| <b>Processed infant products</b>            | 600 (0-840)          | 613.5 (118.5-853.5) | 383.5 (36.0-522.5)   | 9 (0-27.0)*           | 0 (0-11.25)         |
| Infant formulas (ml/day)                    | 600 (0-840)          | 600.0 (100.0-840.0) | 330.0 (0-500.0)*     | 0*                    | 0                   |
| Infant cereals (g/day)                      | 0                    | 9 (0-18.0)*         | 15.8 (4.5-27.0)*     | 0 (0-18.0)*           | 0*                  |
| Infant purees (g/day)                       | 0                    | 0*                  | 0                    | 0*                    | 0                   |
| <b>Sweets and desserts (g/day)</b>          | 0                    | 0                   | 6.0 (3-14.3)*        | 12 (6.0-28.7)         | 18.0 (6.0-37.0)     |
| <b>Sweetened beverages (ml/day)</b>         | 0                    | 0*                  | 0                    | 0                     | 0 (0-33.29)         |

Data expressed as median (interquartile range). <sup>a</sup> Fats included: oils (ml/day) and butter (g/day). <sup>b</sup> Milk and dairy products included: milk (ml/day), milkshake (ml/day) yogurt and cheese (g/day). \**p* value < 0.05 from Kruskal Wallis test compared to the previous category.

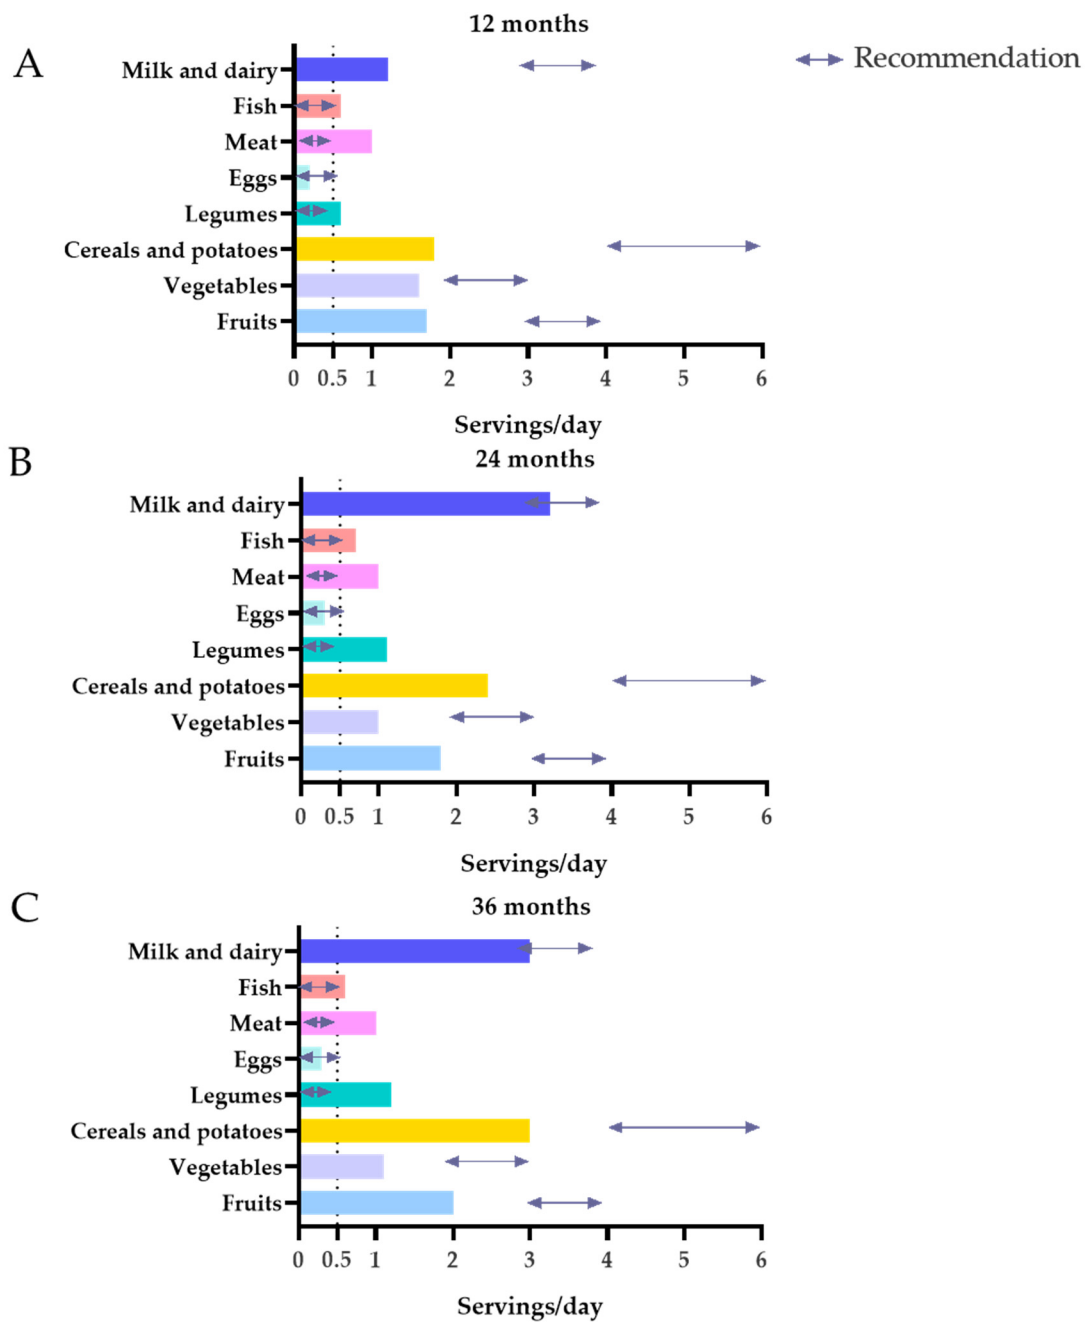

**Supplementary Figure S1.** Adherence to daily food recommendations in the sample along the follow-up. General portion size: Milk and dairy (milk 125 ml, yogurt 125 g and fresh cheese 40 g), legumes 30 g, cereals and potatoes (potatoes 100 g, rice and pasta 75 g and bread 25 g), vegetables 100 g, fruits 100 g, eggs (1 unit). (A) Specific portion size for 12 month: fish 40 g, meat 30 g, (B) Specific portion size for 24 month: fish 50 g, meat 40 g and (C) Specific portion size for 36 month: fish 60 g, meat 50 g [25].
